# Supplementary material for: Competing mortality risks analysis of prediagnostic lifestyle and dietary factors in colorectal cancer survival: the Norwegian Women and Cancer Study
Source: PubMed Central journal article supplement — BMJ Open Gastroenterol. 2019 Oct 30;6(1):e000338. doi: 10.1136/bmjgast-2019-000338 (PMC6827763; doi:10.1136/bmjgast-2019-000338), 2019-10-30
Supplement: bmjgast-2019-000338supp001.pdf [file bmjgast-2019-000338supp001.pdf]

**Supplementary table 1:** Distribution of missing in pre-diagnostic information (%) among CRC survivors by those alive, CRC death, and non-CRC death: the Norwegian Women and Cancer Study

| Characteristics            | Total | Alive | CRC death | Non-CRC death |
|----------------------------|-------|-------|-----------|---------------|
| Total cohort (n)           | 1,861 | 1,201 | 550       | 110           |
| Physical activity          | 13.4  | 13.2  | 12.7      | 19.1          |
| Body mass index (SD)       | 2.6   | 2.2   | 3.3       | 3.6           |
| Duration of education (SD) | 7.5   | 6.8   | 8.7       | 9.1           |
| Annual household income    | 9.1   | 8.1   | 10.7      | 11.8          |
| Alcohol intake (SD)        | 7.7   | 7.4   | 7.8       | 10.0          |
| Smoking status (%)         | 1.6   | 1.7   | 1.5       | 1.8           |

**Supplementary table 2:** Comparison of the complete-case and imputed dataset by pre-diagnostic demographic, lifestyle, and dietary characteristics: the Norwegian Women and Cancer study

| Characteristics               |             | Missing<br>n (%) | Complete-case<br>mean (SD), or % | Multiply imputed<br>mean (SD), or % |
|-------------------------------|-------------|------------------|----------------------------------|-------------------------------------|
| Age at diagnosis of CRC       |             | 0 (0)            | 66.4 (8.7)                       | 66.4 (8.7)                          |
| Physical activity             |             | 250 (13.4)       | 5.5 (1.9)                        | 5.5 (1.9)                           |
| Body mass index (SD)          |             | 48 (2.6)         | 25.2 (4.1)                       | 25.2 (4.1)                          |
| Duration of education (SD)    |             | 140 (7.5)        | 11.1 (3.4)                       | 11.0 (3.4)                          |
| Annual household income       |             | 169 (9.1)        |                                  |                                     |
|                               | Low (%)     |                  | 50.6%                            | 50.6%                               |
|                               | Medium (%)  |                  | 40.7%                            | 40.7%                               |
|                               | High (%)    |                  | 8.7%                             | 8.7%                                |
| Alcohol intake (SD)           |             | 143 (7.7)        | 3.1 (4.5)                        | 3.1 (4.5)                           |
| Smoking status (%)            |             | 30 (1.6)         |                                  |                                     |
|                               | Never (%)   |                  | 34.2%                            | 34.6%                               |
|                               | Ex (%)      |                  | 36.4%                            | 36.2%                               |
|                               | Current (%) |                  | 29.4%                            | 29.2%                               |
| Red and processed meat intake |             | 0 (0)            | 45.9 (26.9)                      | 45.9 (26.9)                         |
| Fish intake                   |             | 0 (0)            | 102.8 (63.5)                     | 102.8 (63.5)                        |
| Vegetable and fruit intake    |             | 0 (0)            | 321.0 (201.7)                    | 321.0 (201.7)                       |
| Vitamin D intake              |             | 0 (0)            | 9.0 (7.8)                        | 9.0 (7.8)                           |

CRC: Colorectal cancer; SD: standard deviation
